# Supplementary material for: Toll-Like Receptor Signaling Drives Btk-Mediated Autoimmune Disease
Source: Front Immunol. 2019 Jan 30;10:95. doi: 10.3389/fimmu.2019.00095 (PMC6363707; doi:10.3389/fimmu.2019.00095)
Supplement: Supplementary file 1 [file Data_Sheet_1.pdf]

**SUPPLEMENTAL MATERIAL TO:**

**Toll-like receptor signaling drives Btk-mediated autoimmune disease**

Jasper Rip<sup>1</sup>, Marjolein J.W. de Bruijn<sup>1</sup>, Marjolein K. Appelman<sup>1</sup>, Simar Pal Singh<sup>1,2</sup>, Rudi W. Hendriks<sup>1,#</sup>  
and Odilia B.J. Corneth<sup>1,#</sup>

<sup>1</sup> Department of Pulmonary Medicine, Erasmus MC Rotterdam, The Netherlands

<sup>2</sup> Department of Immunology, Erasmus MC Rotterdam, The Netherlands

# Authors contributed equally

**Table S1A.** Antibodies used for FACS

| Antigen               | Fluorochrome | Clone        | Manufacturer   |
|-----------------------|--------------|--------------|----------------|
| <b>Flow cytometry</b> |              |              |                |
| B220                  | AF700        | RA3-6B2      | BD Biosciences |
| CD1d                  | BV421        | 1B1          | BD Biosciences |
| CD3                   | APC-efl780   | 17A2         | eBioscience    |
|                       | BV421        | 145-2C11     | BD Biosciences |
| CD4                   | AF700        | GK1.5        | eBioscience    |
|                       | PCP-cy5.5    | RM3-5        | eBioscience    |
| CD5                   | APC          | Ly-1         | eBioscience    |
| CD11b                 | AF700        | M1/70        | eBioscience    |
| CD19                  | APC-ef780    | 1D3          | BD Biosciences |
|                       | PCP-Cy5.5    | eBio1D3      | eBioscience    |
| CD21/35               | FITC         | eBio4E3      | eBioscience    |
|                       | BV605        | 7G6          | BD Biosciences |
| CD23                  | PE-Cy7       | B3B4         | BD Biosciences |
| CD25                  | BV605        | PC61         | Biolegend      |
| CD43                  | PE           | S7           | BD Biosciences |
| CD80                  | PCP-cy5.5    | GL1          | BD Biosciences |
| CD86                  | PE-cy7       | GL1          | BD Biosciences |
| CD95                  | PE-CF594     | Jo2          | BD Biosciences |
| CD138                 | APC          | 281-2        | BD Biosciences |
| IgD                   | FITC         | 11-26c.2a    | eBioscience    |
|                       | BV711        | 11-26c.2a    | BD Biosciences |
| IgM                   | PE-Cy7       | II/41        | BD Biosciences |
| IgG1                  | FITC         | A85-1        | BD Biosciences |
| CTLA4                 | PE           | UC10-4F10-11 | BD Biosciences |
| CXCR5                 | Biotin       | 2G8          | BD Biosciences |
| FoxP3                 | FITC         | FJK-16s      | eBioscience    |
| ICOS                  | APC          | C398.4A      | eBioscience    |
| IFN- $\gamma$         | PE-Cy7       | XMG1.2       | eBioscience    |
| IL-6                  | PE           | MP5-20F3     | BD Biosciences |
| IL-10                 | FITC         | JES5-16E3    | eBioscience    |
| PD-1                  | BV421        | J43          | BD Biosciences |
| TLR7                  | PE           | A94B10       | BD Biosciences |
| TLR9                  | PE           | J15A7        | BD Biosciences |
| Streptavidin          | APC-efl780   | -            | eBioscience    |
|                       | PE-Cy7       | -            | eBioscience    |
|                       | BV711        | -            | BD Biosciences |

**Table S1B.** Antibodies used for Phosphoflow

| Antigen                | Fluorochrome | Clone      | Manufacturer                |
|------------------------|--------------|------------|-----------------------------|
| <b>Phosphoflow</b>     |              |            |                             |
| CD3                    | BV421        | 145-2C11   | BD Bioscience               |
| B220                   | AF700        | RA3-6B2    | BD Biosciences              |
| IgD                    | BV711        | 11-26c.2a  | BD Biosciences              |
| IgM                    | PE-Cy7       | II/41      | BD Biosciences              |
| pCD79a (Y182)          | AF647        | D1B9       | Cell signaling Technologies |
| pSyk (Y348)            | PE           | L120-722   | BD Biosciences              |
| pAkt (T308)            | -            | D25E6      | Cell signaling Technologies |
| pAkt (S473)            | -            | D9E        | Cell signaling Technologies |
| pPLC $\gamma$ 2 (Y759) | AF647        | K86-689.37 | BD Biosciences              |
| pS6 (S240/S244)        | -            | D68F8      | Cell signaling Technologies |
| anti-Rabbit            | PE           | -          | Jackson ImmunoResearch      |
| Streptavidin           | BV786        | -          | BD Biosciences              |

**Table S1C.** Antibodies used for MACS procedures

| Antigen | Fluorochrome | Clone     | Manufacturer  |
|---------|--------------|-----------|---------------|
| CD5     | Biotin       | 53-7.3    | BD Bioscience |
| CD11b   | Biotin       | M1/70     | eBioscience   |
| CD138   | Biotin       | 281-2     | BD Bioscience |
| CD43    | Biotin       | eBioR2/60 | eBioscience   |
| CD95    | Biotin       | Jo2       | BD Bioscience |
| Gr-1    | Biotin       | RB6-8C5   | eBioscience   |
| TER-119 | Biotin       | TER119    | eBioscience   |

**Table S2.** Autoantibody reactivity in aged WT, CD19-hBtk mice and *Myd88*<sup>-/-</sup> CD19-hBtk mice.

| Genotype                              | Reactivity of autoantibodies*) |                                                |
|---------------------------------------|--------------------------------|------------------------------------------------|
| Wild-type                             | #1                             | -                                              |
|                                       | #2                             | -                                              |
|                                       | #3                             | -                                              |
| CD19-hBtk                             | #1                             | Histones (++), RNP-A (++), RNP-C (++)          |
|                                       | #2                             | RNP-A (++), RNP-C (+)                          |
|                                       | #3                             | Histones (++), RNP-A (++), RNP-C (++), SmB (+) |
|                                       | #4                             | RNP-A (+)                                      |
|                                       | #5                             | Histones (++), RNP-A (++), RNP-C (++)          |
|                                       | #6                             | Histones (++), RNP-A (++), RNP-C (++)          |
|                                       | #7                             | Histones (++), RNP-A (+), RNP-C (+)            |
| <i>Myd88</i> <sup>-/-</sup> CD19-hBtk | #1                             | -                                              |
|                                       | #2                             | -                                              |
|                                       | #3                             | -                                              |

\*) Autoantibody reactivity in 28-33 week-old mice, as measured by Line Immunoblot Assay.

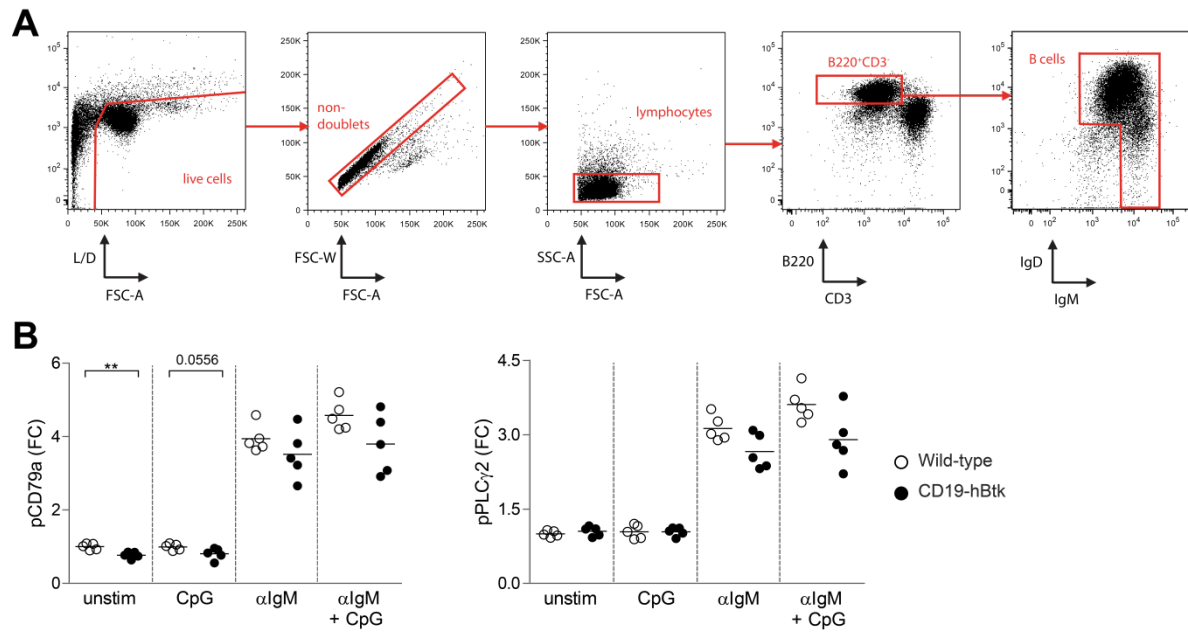

**Supplementary Figure 1. Gating strategy phosphoflow and analysis of pCD79a and pPLCγ2 in B cells after stimulation.**

(A) Gating strategy for live cells by viability marker staining, followed by gating for single lymphocytes. From live lymphocytes, we gated for splenic B cells (B220<sup>+</sup>CD3<sup>-</sup>IgD<sup>+</sup>IgM<sup>+</sup>). (B) Fold Change (FC) increase of median fluorescence intensity (MFI) values compared to WT unstimulated (which was set to 1.0) for phosphorylation of CD79a and PLCγ2 in B cells that were activated by the indicated stimuli. Symbols represent individual mice and bars indicate mean values. CD19-hBtk and WT mice were 8-10 weeks old; n = 4-5 per group; \*\*p<0.01 by Mann-Whitney U test.

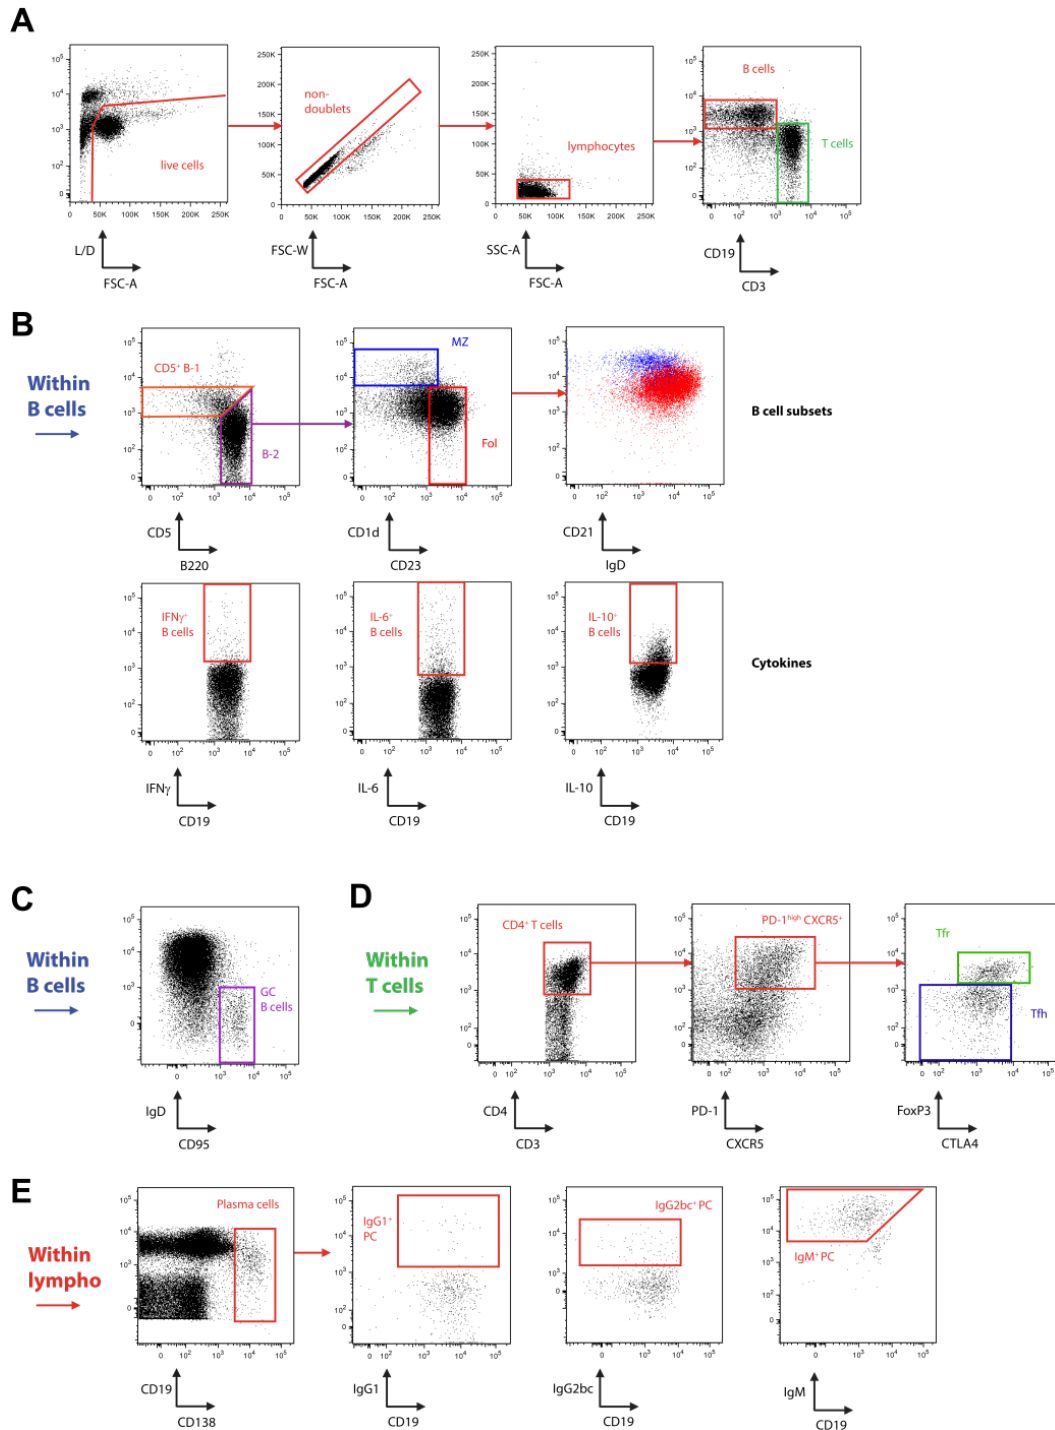

**Supplementary Figure 2. Gating strategy for cytokine stainings, B cell subsets and plasma cells.**

(A) For all stainings, we first gated for single live B and T cells, based on CD19 and CD3 expression. (B) For B cell subset cytokine staining, we gated within CD19<sup>+</sup>CD3<sup>-</sup> B cells for CD5<sup>+</sup> B-1 cells (CD19<sup>+</sup>B220<sup>int</sup>CD5<sup>+</sup>), marginal zone B cells (CD19<sup>+</sup>B220<sup>+</sup>CD1d<sup>high</sup>CD21<sup>high</sup>CD23<sup>+</sup>IgD<sup>-</sup>) and follicular B cells (CD19<sup>+</sup>B220<sup>+</sup>CD1d<sup>-</sup>CD21<sup>+</sup>CD23<sup>+</sup>IgD<sup>+</sup>). Expression of IFN $\gamma$ , IL-6 and IL-10 within total B cells are shown as examples. (C) From B cells, we gated for germinal center B cells (CD19<sup>+</sup>IgD<sup>-</sup>CD95<sup>+</sup>). (D) From T cells, we gated on CD4<sup>+</sup> cells that highly express PD-1 and are CXCR5-positive. Foxp3 and CTLA4 were used to separate T follicular helper cells (Tfh; CD3<sup>+</sup>CD4<sup>+</sup>CXCR5<sup>+</sup>PD1<sup>+</sup>FoxP3<sup>+</sup>) and T follicular regulatory cells (Tfr; CD3<sup>+</sup>CD4<sup>+</sup>CXCR5<sup>+</sup>PD1<sup>+</sup>FoxP3<sup>+</sup>); representative flow cytometry graphs for these gating strategies. (E) From CD11b-negative lymphocytes, we gated for IgM<sup>+</sup>, IgG1<sup>+</sup> and IgG2bc<sup>+</sup> plasma cells (PC; CD11b<sup>-</sup>IgG1<sup>+</sup>IgG2bc<sup>+</sup>IgM<sup>+</sup>CD138<sup>+</sup>, CD11b<sup>-</sup>IgG1<sup>+</sup>CD138<sup>+</sup> and CD11b<sup>-</sup>IgG2bc<sup>+</sup>CD138<sup>+</sup> respectively).

**A**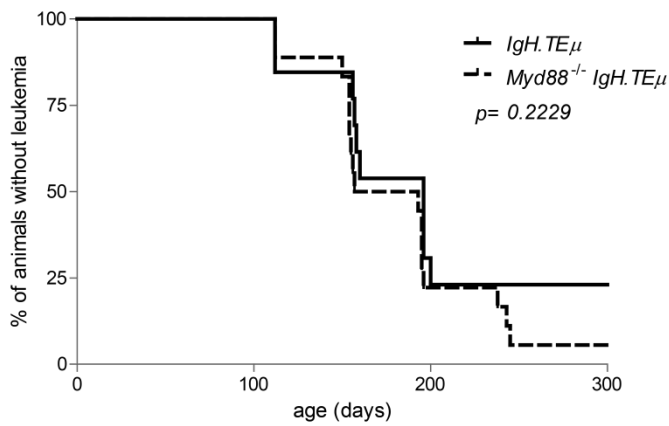**B**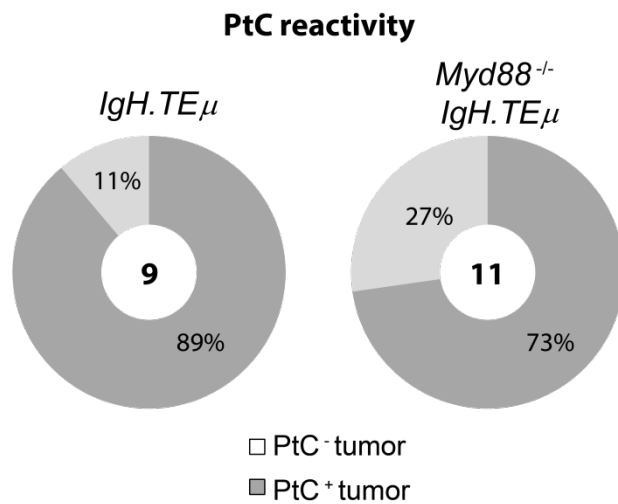

**Supplementary Figure 3 (A)** Retrospective Kaplan-Meier incidence curve showing *IgH.TEμ* mice (solid line) and *Myd88<sup>-/-</sup> IgH.TEμ* mice (dotted line). **(B)** Pie chart summarizing frequencies of splenic PtC-recognizing (PtC<sup>+</sup>) and non PtC-recognizing (PtC<sup>-</sup>) CLL cases from nine *IgH.TEμ* mice (*left*) and eleven *Myd88<sup>-/-</sup> IgH.TEμ* mice (*right*), as indicated. Log Rank test was performed to calculate the significance for survival differences between indicated groups.

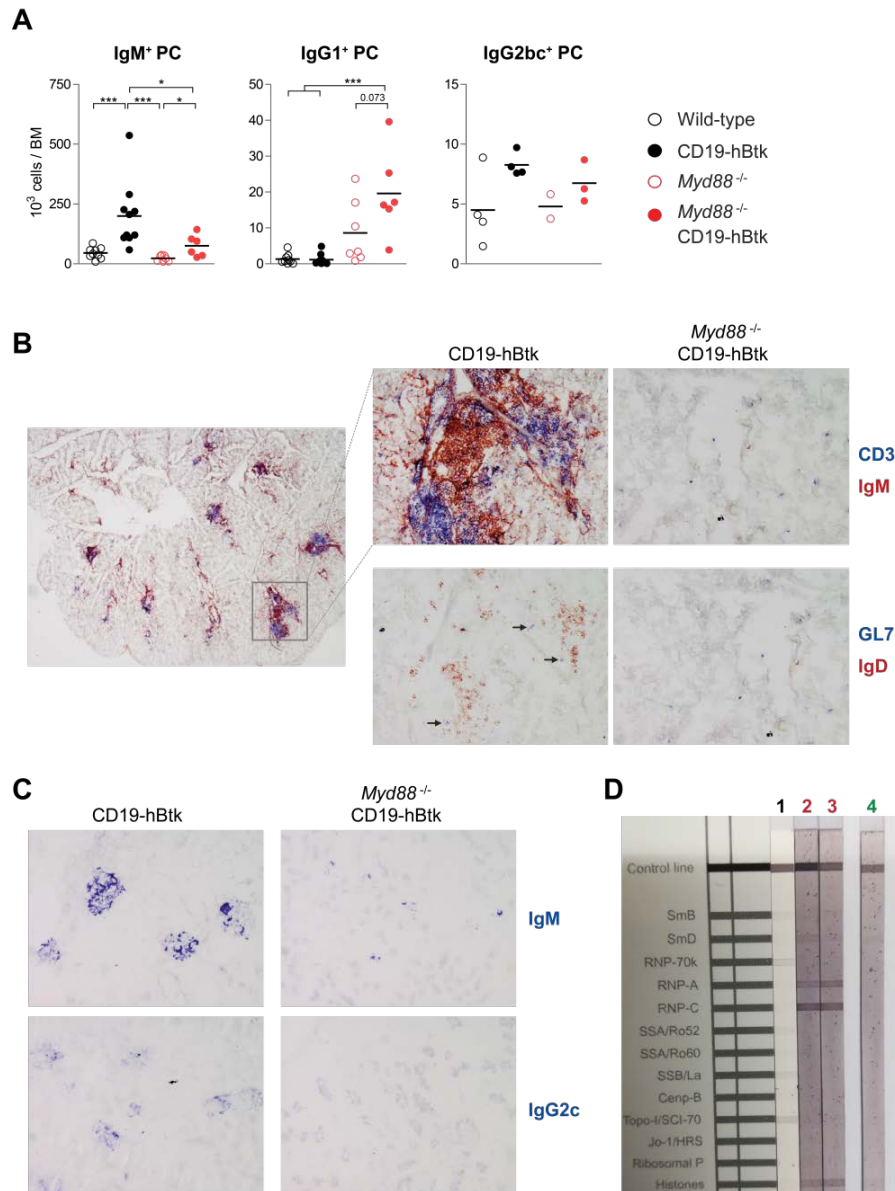

**Supplementary Figure 4. The autoimmune phenotype of CD19-hBTK mice, compared with *Myd88*<sup>-/-</sup> CD19-hBtk mice.**

(A) Absolute numbers of bone marrow (BM) IgM<sup>+</sup>, IgG1<sup>+</sup> and IgG2bc<sup>+</sup> plasma cells (PC; CD11b<sup>-</sup>IgG1<sup>-</sup>IgGbc<sup>-</sup>IgM<sup>+</sup>CD138<sup>+</sup>, CD11b<sup>-</sup>IgG1<sup>+</sup>CD138<sup>+</sup> and CD11b<sup>-</sup>IgG2bc<sup>+</sup>CD138<sup>+</sup> respectively). Numbers are per single femur. (B) Histological analysis of salivary gland sections for CD3<sup>+</sup> T cells (blue) and IgM<sup>+</sup> B cells (red) (top panel) and GL7<sup>+</sup> GC B cells (blue) and IgD<sup>+</sup> B cells (red) (lower panel) at 28-33 weeks of age. Representative pictures are shown, n= 3 per group. (C) Histological analysis for IgM (upper panel) and IgG2c (lower panel) immune complex deposition in kidney glomeruli at 28-33 weeks of age. Representative pictures are shown, n= 3 per group. (D) Line Immunoblot Assay (LIA) for extractable nuclear antigens. The indicator reference is located on the left. On top of the LIA strips, five immunoblots are indicated by numbers: the cut-off control (1) and representative pictures of CD19-hBtk (2,3), wild-type (4) and *Myd88*<sup>-/-</sup> CD19-hBtk (5) mice. Only CD19-hBtk mice stained positive for autoantibodies, in these specific cases for RNP-A, RNP-C and histones.
